# Supplementary material
Source: publisher figshare collection journal article supplement (https://acs.figshare.com/ndownloader/files/5026078)
Supplement: Supplementary file 1 [file 5026078]

## Supporting Information

# Toward a Molecular Understanding of the Mechanism of Cryopreservation by Polyampholytes: Cell Membrane Interactions and Hydrophobicity

*Robin Rajan<sup>1</sup>, Fumiaki Hayashi<sup>2</sup>, Toshio Nagashima<sup>3</sup>, Kazuaki Matsumura<sup>1\*</sup>*

<sup>1</sup>School of Materials Science, Japan Advanced Institute of Science and Technology, 1-1 Asahidai, Nomi, Ishikawa 923-1292, Japan

<sup>2</sup>NMR Facility Support Unit, NMR Facility, Division of Structural and Synthetic Biology, RIKEN Center for Life Science Technologies, 1-7-22 Suehiro-cho, Tsurumi-ku, Yokohama City, Kanagawa, 230-0045, Japan

<sup>3</sup> NMR Facility, Division of Structural and Synthetic Biology, RIKEN Center for Life Science Technologies, 1-7-22 Suehiro-cho, Tsurumi-ku, Yokohama City, Kanagawa, 230-0045, Japan

\*To whom correspondence should be addressed:

Kazuaki Matsumura

E-mail address: mkazuaki@jaist.ac.jp

Tel.: +81-761-51-1680

Fax: +81-761-51-1149

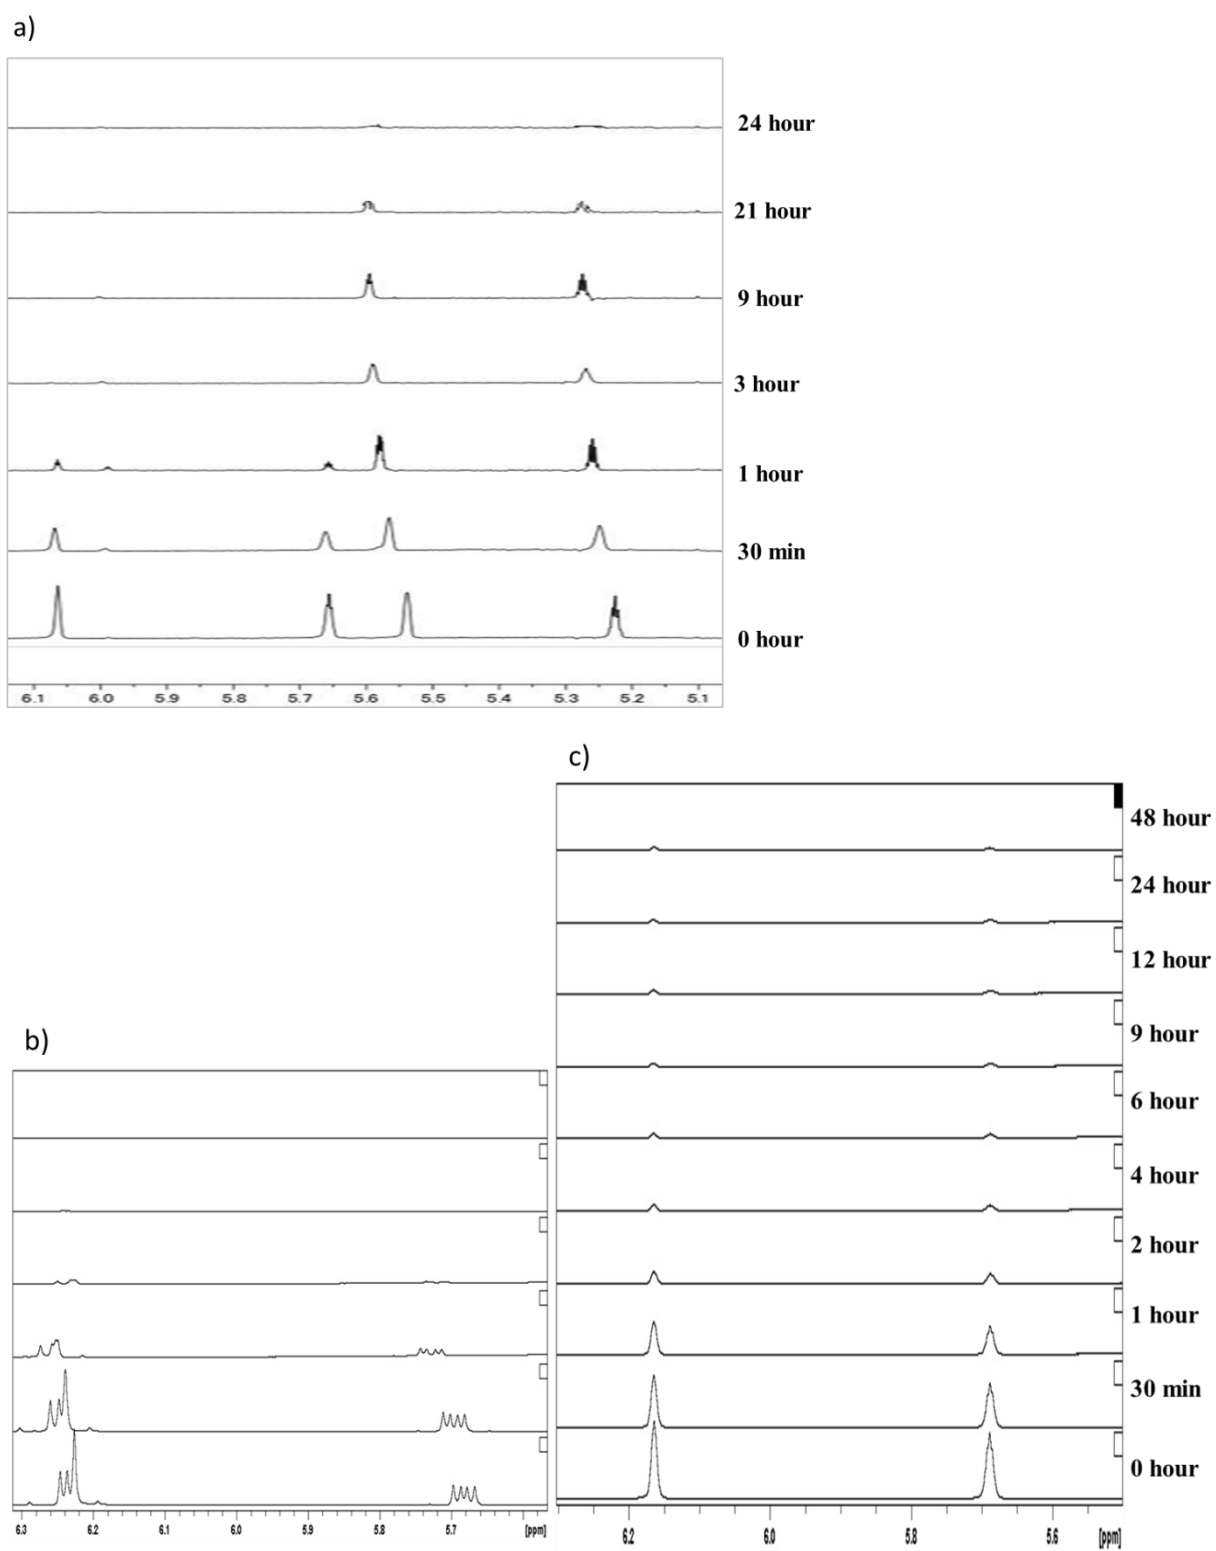

**Figure S1.** Time-dependent  $^1\text{H}$ -NMR spectra of (a) poly-(MAA-DMAEMA), (b) poly-SPB and (c) poly-CMB in  $\text{D}_2\text{O}$

(a)

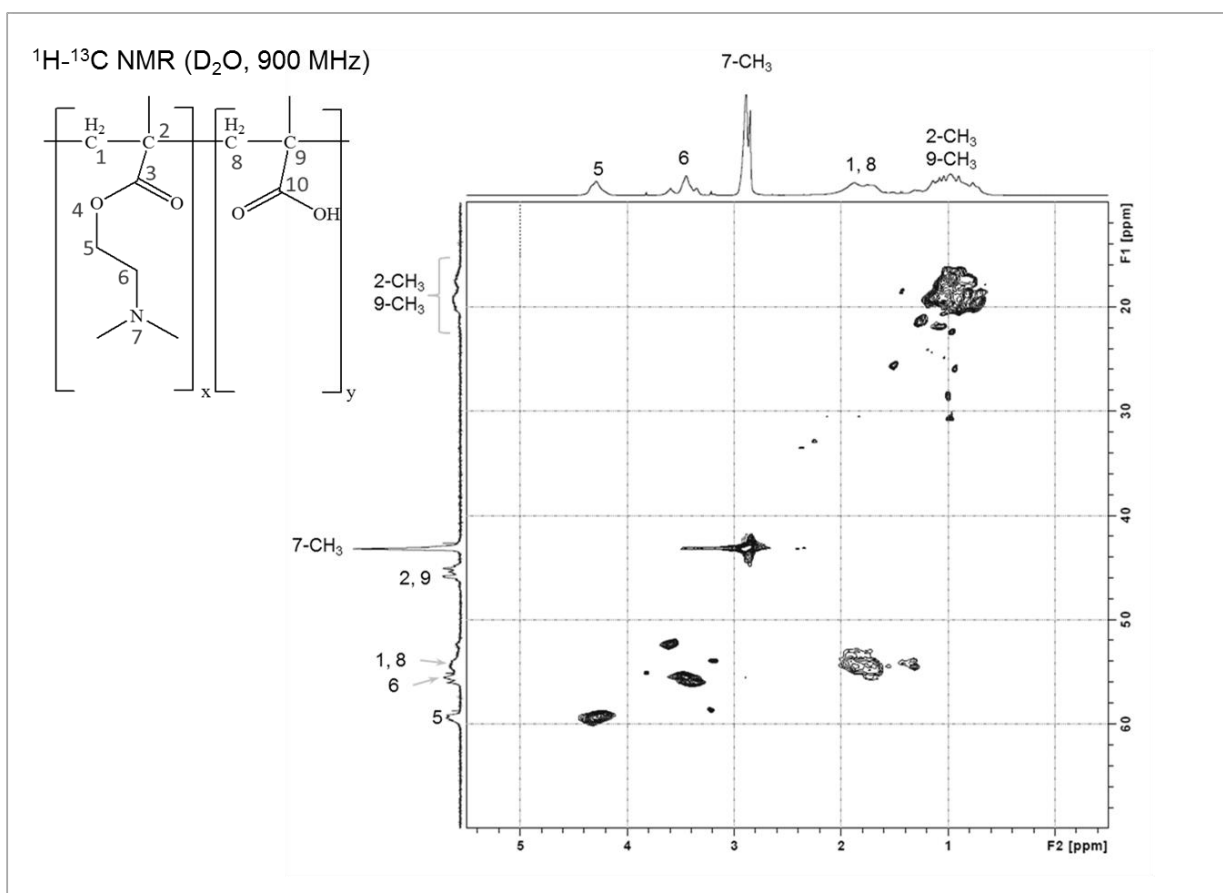

(b)

$^1\text{H}$ - $^{13}\text{C}$  NMR ( $\text{D}_2\text{O}$ , 900 MHz)

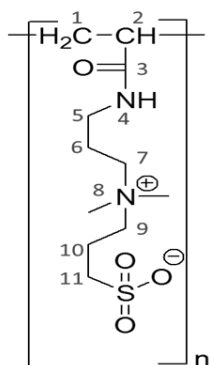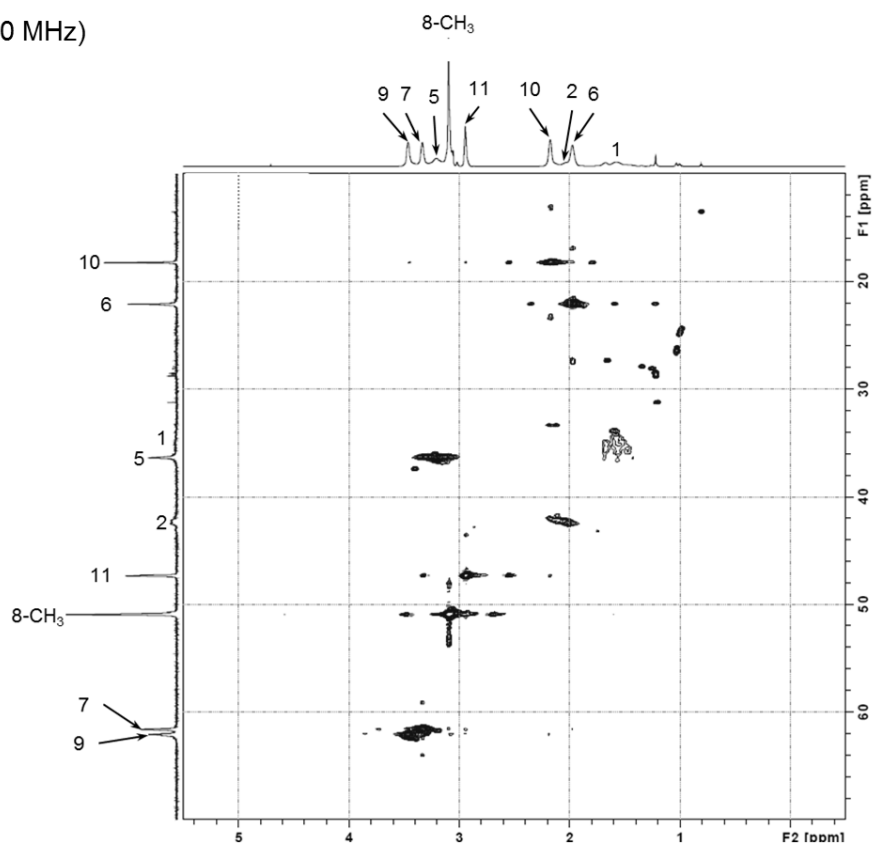

(c)

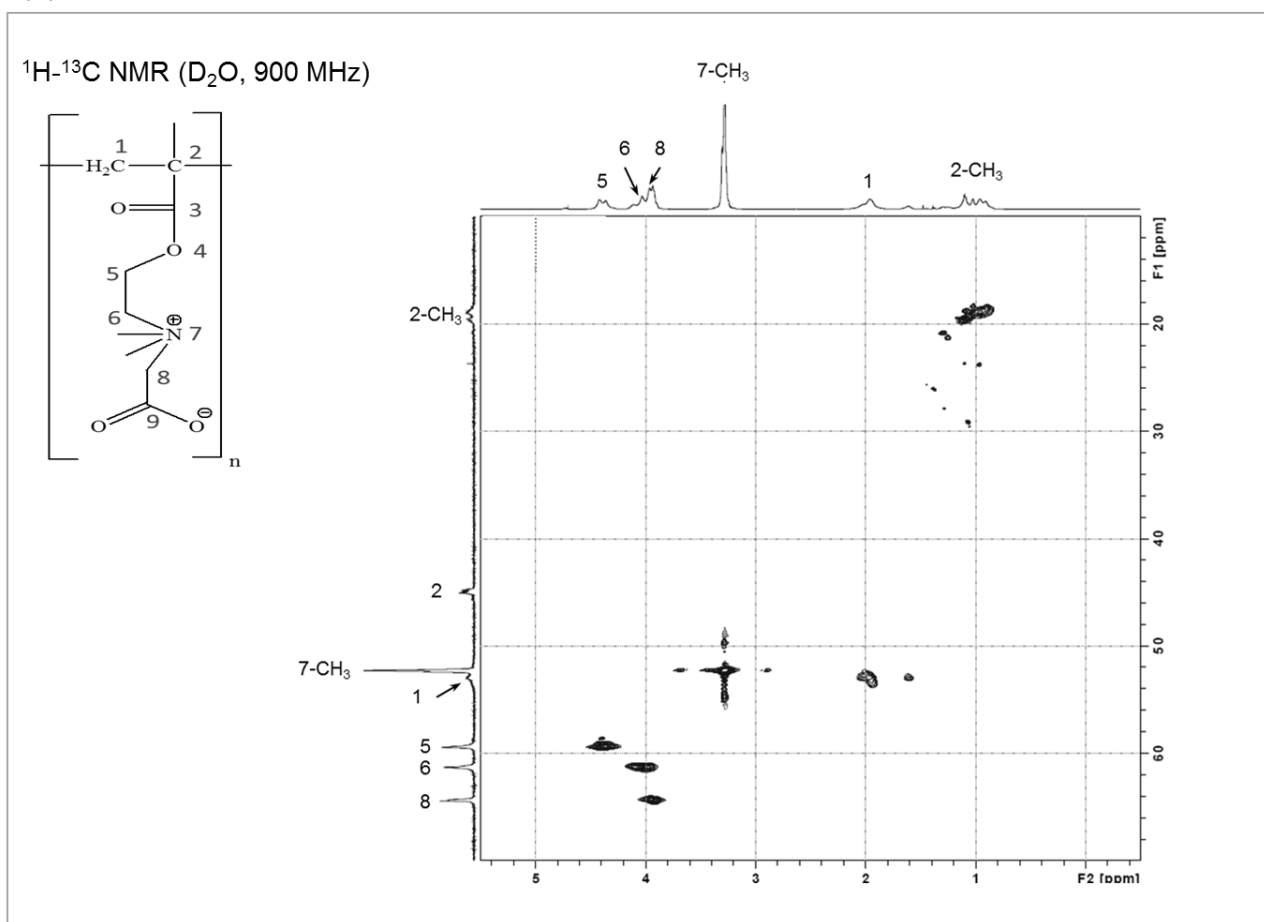

**Figure S2.** NMR signal assignment of (a) poly-(MAA-DMAEMA), (b) poly-SPB, or (c) poly-CMB in  $\text{D}_2\text{O}$ .

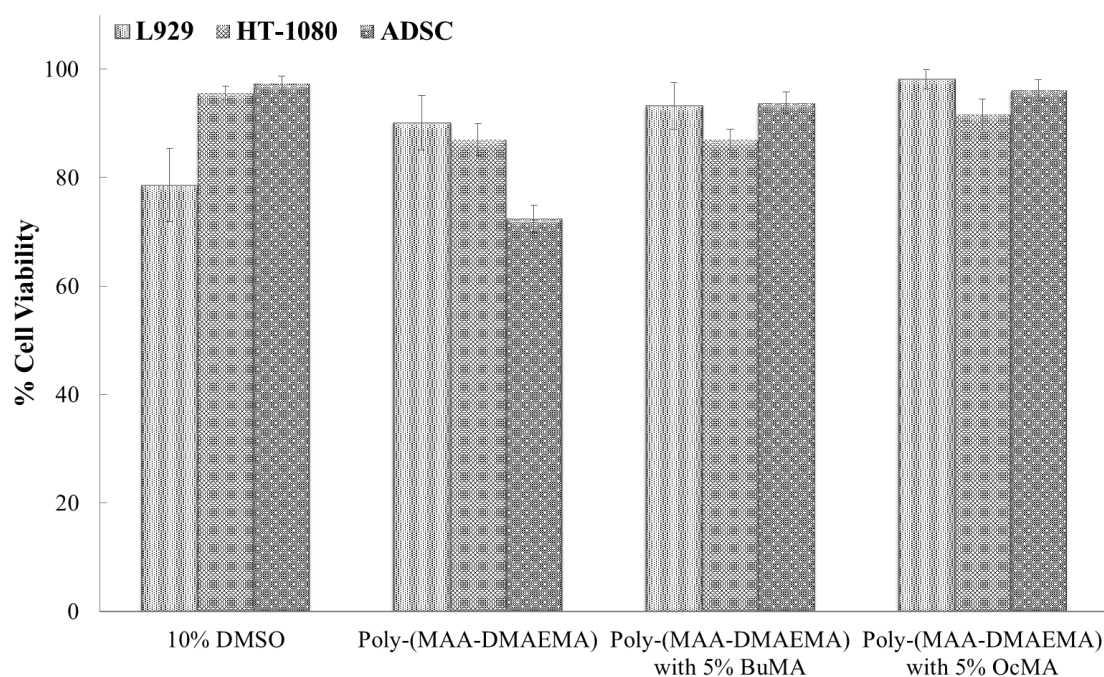

**Figure S3.** Cryoprotective properties of poly-(MAA-DMAEMA) Different cell lines were cryopreserved with the MAA-DMAEMA copolymer at 15% polymer concentration. Data are expressed as the mean  $\pm$  SD for 3 independent experiments (5 samples each).

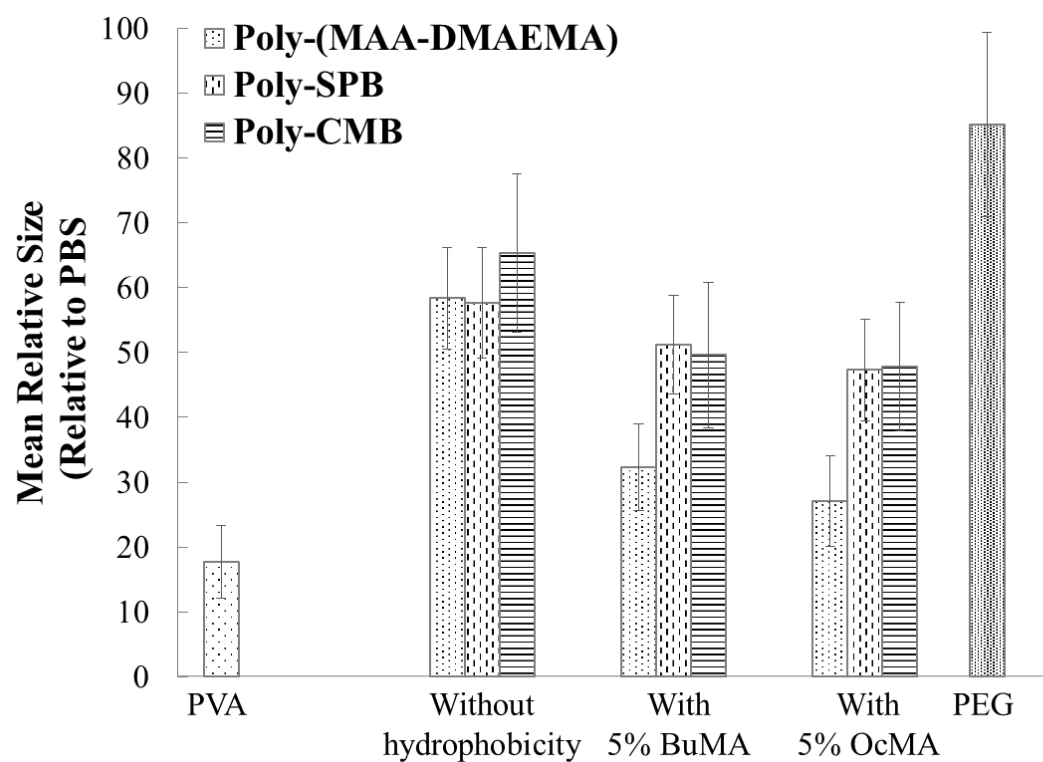

**Figure S4.** IRI activities of poly-(MAA-DMAEMA), poly-SPB, poly-CMB and the effect of hydrophobicity at a 2% polymer concentration. The IRI activity has been compared with PVA (positive control) and PEG (negative control). The errors bars indicate the SD of the mean.

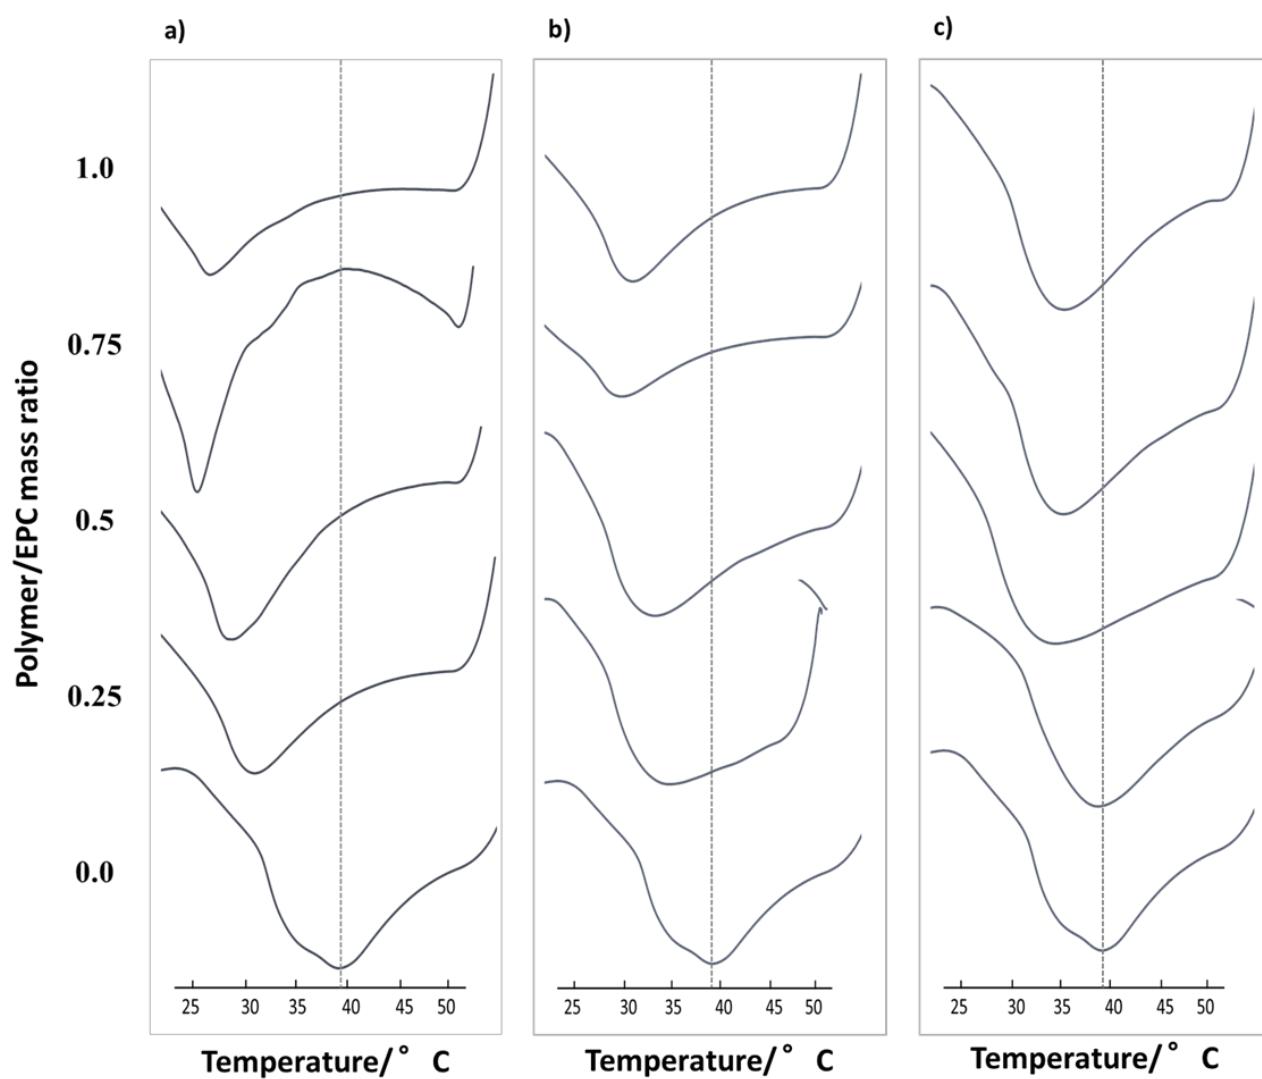

**Figure S5.** DSC heating thermograms of EPC liposomes in the presence of different amounts of (a) poly-(MAA-DMAEMA), (b) poly-SPB, or (c) poly-CMB. The resulting polymer/EPC mass ratios are indicated to the right of each trace.



**Table S1.** Viscosity of various polymers, with and without their hydrophobic derivatives

at a 2.5% polymer concentration

| Polymer           | Viscosity (mPa • s)      |              |              |
|-------------------|--------------------------|--------------|--------------|
|                   | Without hydrophobic part | BuMA         | OcMA         |
| Poly-(MAA-DMAEMA) | 1.25 ± 0.02              | 1.30 ± 0.03  | 1.41 ± 0.02  |
| Poly-SPB          | 0.999 ± 0.04             | 1.024 ± 0.03 | 1.032 ± 0.06 |
| Poly-CMB          | 1.076 ± 0.1              | 1.148 ± 0.15 | 1.173 ± 0.18 |
